# Supplementary material for: Transcriptome and metabolomic analysis to reveal the browning spot formation of ‘Huangguan’ pear
Source: BMC Plant Biol. 2021 Jul 3;21:321. doi: 10.1186/s12870-021-03049-8 (PMC8255024; doi:10.1186/s12870-021-03049-8)
Supplement: Supplementary file 2 — Additional file 2. List the number of reads based on RNA-Seq data. [file 12870_2021_3049_MOESM2_ESM.xlsx]

## Sheet: sheet 1
Transcriptome and metabolomic analysis to reveal the browning spot formation of ‘Huangguan’ pear Qi Wang¶, Xinyi Wu¶, Li Liu¶, Daozhi Yao, Jinchao Li, Jie Fang, Xiaonan Chen, Liwu Zhu, Pu Liu, Zhenfeng Ye, Bing Jia*, Wei Heng*
Table S1. Number of reads based on RNA-Seq data of normal skin and SBS skin as well as three treatments of 'Huangguan' pear.
Sample	#Raw reads（M）	#Clean reads（M）	Total Clean Bases(Gb)	Clean Reads Ratio(%)	%Mapping
CK1_1	45.74	39.73	5.96	86.87	69.91
CK_2	49.78	43.31	6.5	86.99	70.24
CK_3	43.27	37.51	5.63	86.68	70.25
BS2_1	49.08	43.42	6.51	88.47	71.94
BS_2	49.08	44.04	6.61	89.72	71.9
BS_3	46	40.77	6.12	88.64	72.68
P3_1	47.16	42.25	6.34	89.59	71.81
P_2	46.65	41.96	6.29	89.93	70.86
P_3	43.77	39.13	5.87	89.39	71.39
ABA4_1	46.64	41.71	6.26	89.44	72.2
ABA_2	47.1	42.09	6.31	89.36	70.99
ABA_3	48.7	43.18	6.48	88.66	71.32
GA35_1	42.43	37.64	5.65	88.72	71.2
GA3_2	49.08	43.44	6.52	88.5	71.23
GA3_3	49.08	43.57	6.53	88.77	71.36
Total	703.56	623.75	93.58
Average				88.6487	71.2853
1CK= Normal 'Huangguan' pear exocarp
2BS = Skin browning spot(chicken-claw disease) of 'Huangguan' pear exocarp
3P = 'Huangguan' pear without BS disease after treated with P (0.2%NaH2PO4•2H2O)
4ABA = 'Huangguan' pear without BS disease after treated with ABA (100μM)
5GA3 = 'Huangguan' pear without BS disease after treated with GA3 (300mg/L)
